# Supplementary material for: Mediating-Moderating Effect of Allostatic Load on the Association between Dietary Approaches to Stop Hypertension Diet and All-Cause and Cause-Specific Mortality: 2001–2010 National Health and Nutrition Examination Surveys
Source: PubMed Central journal article supplement (PMC6836046; doi:10.3390/nu11102311), 2019-09-29
Supplement: nutrients-11-02311-s001.pdf [file nutrients-11-02311-s001.pdf]

**Table 1.** DASH diet scoring system.

| <b>Nutrient</b>     | <b>DASH diet nutrient composition <sup>a</sup></b> | <b>DASH score target (1)</b> | <b>Intermediate target (0.5)</b> |
|---------------------|----------------------------------------------------|------------------------------|----------------------------------|
| Saturated fat       | 6% of energy                                       | 6% of energy                 | 11% of energy                    |
| Total fat           | 27% of energy                                      | 27% of energy                | 32% of energy                    |
| Protein             | 18% of energy                                      | 18% of energy                | 16.5% of energy                  |
| Cholesterol         | 150 mg                                             | 71.4 mg/1000 kcal            | 107.1 mg/1000 kcal               |
| Fiber               | 31 g                                               | 14.8 g/1000 kcal             | 9.5 g/1000 kcal                  |
| Magnesium           | 500 mg                                             | 238 mg/1000 kcal             | 158 mg/1000 kcal                 |
| Calcium             | 1240 mg                                            | 590 mg/1000 kcal             | 402 mg/1000 kcal                 |
| Potassium           | 4700 mg                                            | 2238 mg/1000 kcal            | 1534 mg/1000 kcal                |
| Sodium <sup>b</sup> | 2400 mg                                            | 1143 mg/1000 kcal            | 1286 mg/1000 kcal                |

**Abbreviation:** DASH, Dietary Approaches to Stop Hypertension trial. <sup>a</sup> Based on a 2100-kcal diet. <sup>b</sup> Sodium target based on the Sixth Report of the Joint National Committee on Prevention, Detection, Evaluation, and Treatment of High Blood Pressure recommendations.

#### **Source:<sup>1</sup>**

1. Mellen PB, Gao SK, Vitolins MZ, Goff DC, Jr. Deteriorating dietary habits among adults with hypertension: DASH dietary accordant, NHANES 1988-1994 and 1999-2004. Archives of internal medicine 2008;168:308-14.

**Table 2.** Allostatic Load Score.

|                                    | <b>1</b>                       | <b>0.5</b>                           | <b>0</b>                       |
|------------------------------------|--------------------------------|--------------------------------------|--------------------------------|
| <b>SBP</b>                         | ≥150 mmHg                      | 120 to <150 mmHg                     | <120 mmHg                      |
| <b>DBP</b>                         | ≥90 mmHg                       | 80 to <90 mmHg                       | <80 mmHg                       |
| <b>BMI</b>                         | ≥30 kg/m <sup>2</sup>          | 25 to <30 kg/m <sup>2</sup>          | <25 kg/m <sup>2</sup>          |
| <b>HbA1c</b>                       | ≥6.5%                          | 5.7% to <6.5%                        | <5.7%                          |
| <b>Total cholesterol</b>           | ≥240 mg/dL                     | 200 to <240 mg/dL                    | <200 mg/dL                     |
| <b>HDL cholesterol</b>             | <40 mg/dL                      | 40 to <60 mg/dL                      | ≥60 mg/dL                      |
| <b>Total/HDL cholesterol ratio</b> | ≥6                             | 5 to <6                              | <5                             |
| <b>CRP</b>                         | ≥3 mg/L                        | 1 to <3 mg/L                         | <1 mg/L                        |
| <b>Albumin</b>                     | <3.0 µg/mL                     | 3.0 to <3.8 µg/mL                    | ≥3.8 µg/mL                     |
| <b>Creatinine clearance</b>        | <30 mL/min/1.73 m <sup>2</sup> | 30 to <60 mL/min/1.73 m <sup>2</sup> | ≥60 mL/min/1.73 m <sup>2</sup> |

**Source:**<sup>2</sup>

- Rodriguez EJ, Livaudais-Toman J, Gregorich SE, Jackson JS, Napoles AM, Perez-Stable EJ. Relationships between allostatic load, unhealthy behaviors, and depressive disorder in U.S. adults, 2005-2012 NHANES. Preventive medicine 2018;110:9-15.
